# Supplementary material for: LINC00470 Coordinates the Epigenetic Regulation of ELFN2 to Distract GBM Cell Autophagy
Source: PubMed Central journal article supplement — Mol Ther. 2018 Jun 27;26(9):2267–81. doi: 10.1016/j.ymthe.2018.06.019 (PMC6127511; doi:10.1016/j.ymthe.2018.06.019), 2018-06-27
Supplement: mmc1.pdf [file mmc1.pdf]

YMTHE, Volume 26

## **Supplemental Information**

**LINC00470 Coordinates the Epigenetic**

**Regulation of ELFN2 to Distract GBM**

**Cell Autophagy**

**Changhong Liu, Haijuan Fu, Xiaoping Liu, Qianqian Lei, Yan Zhang, Xiaoling She, Qiang Liu, Qing Liu, Yingnan Sun, Guiyuan Li, and Minghua Wu**

## Supplemental Figures

**FigureS1 The relationship between ELFN2 promoter methylation status,mRNA level of ELFN2 and protein level of ELFN2**

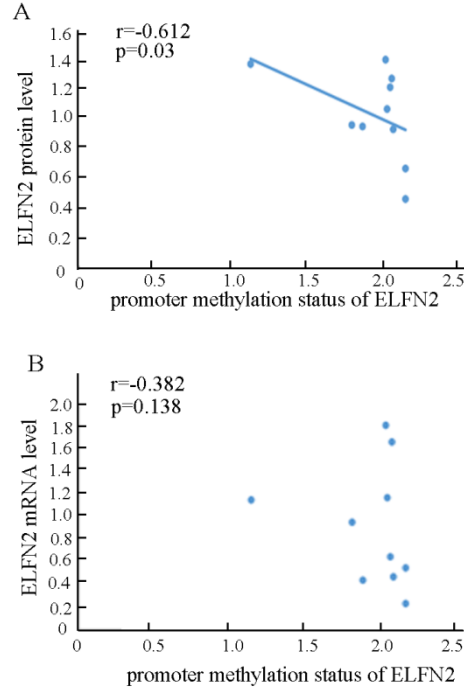

Inversed correlation between ELFN2 promoter methylation status and protein level of ELFN2 in glioma

**FigureS2 miR-101 and pre-miR-101 bound with LINC00470**

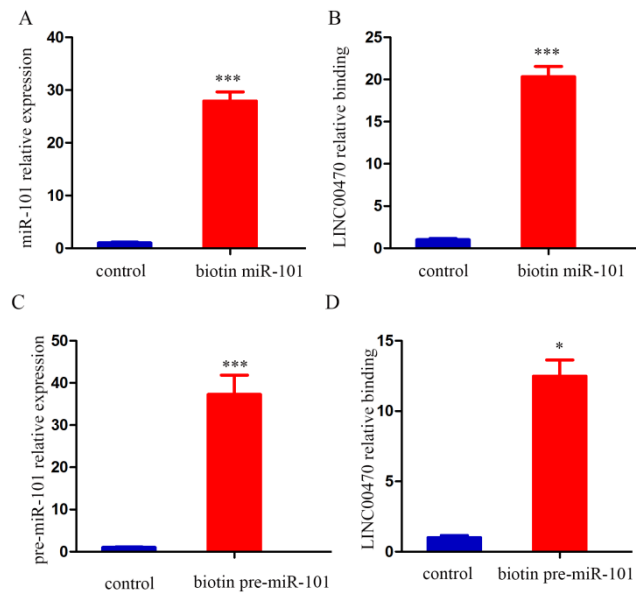

A. Levels of miR-101 following transfection of 80 nM biotinylated-miR-101 measured by RT-qPCR analysis. Data presented as mean±S.E.M. of three independent experiments, \*\*\*p<0.001.

B. Levels of LINC00470 pulled down by biotin-miR-101 measured by RT-qPCR. Data presented as mean±S.E.M. of three independent experiments, \*\*\*p<0.001.

C. Levels of pre-miR-101 following transfection of 80 nM biotinylated-miR-101 measured by RT-qPCR analysis, \*\*\*p<0.001.

D. Levels of LINC00470 pulled down by biotin-pre-miR-101 measured by RT-qPCR. Data presented as mean±S.E.M. of three independent experiments, \*p<0.05.

**FigureS3 The localization of LINC00470,pre-miR-101 and miR-101 in GBM cells**

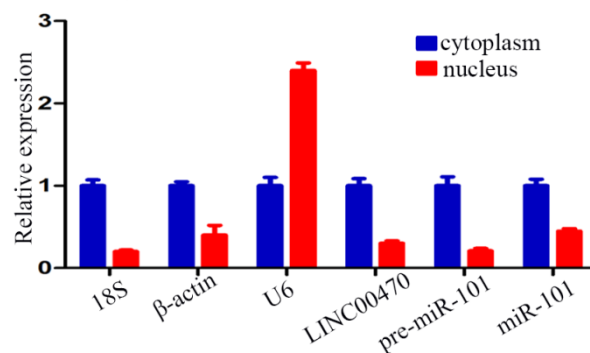

RT-qPCR was used to detect the expression of LINC00470,pre-miR-101 and miR-101 in nucleus and cytoplasm of GBM cell. Data presented as mean±S.E.M. of three independent experiments.

**FigureS4 LINC00470 regulated EZH2 and EED expression via miR-101**

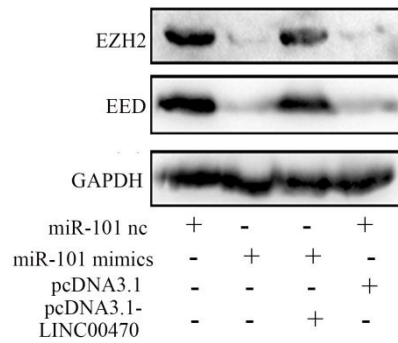

Western blotting was performed to detect the expression of EZH2 and EED after overexpression of miR-101 and LINC00470.

**FigureS5 Statistical analysis of EDU and tumors volume in the coronal section of rats**

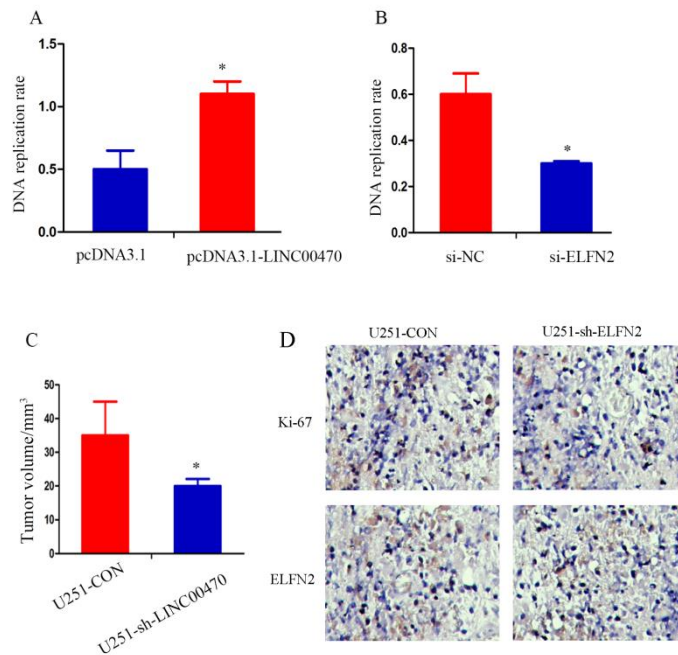

A. Statistical analysis of EDU assay after overexpression of ELFN2 in U251 cells. Data presented as means±S.E.M. of three independent experiments. \*p < 0.05.

B. Statistical analysis of EDU assay after knockdown of ELFN2 in U251 cells. Data presented as means±S.E.M. of three independent experiments. \*p < 0.05.

C. Statistical analysis of shELFN2-induced tumors volume in the coronal section of rats.

D. Expression of Ki-67 and ELFN2Vin intracranial transplanted tumors was detected by immunohistochemical staining or in situ hybridization, respectively.

### FigureS6 miR-101 inhibited U251 cells autophagy

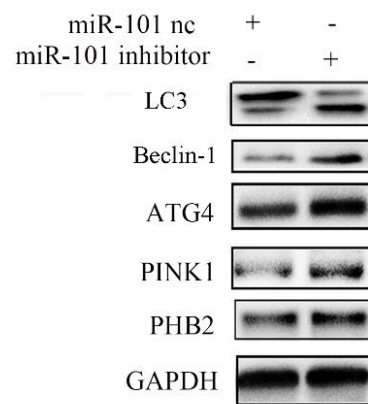

Western blotting measured the expression levels of autophagy marker LC3, beclin-1, ATG4, and ATG5 in U251 cells.

**FigureS7 IP efficiency was validated by western blotting**

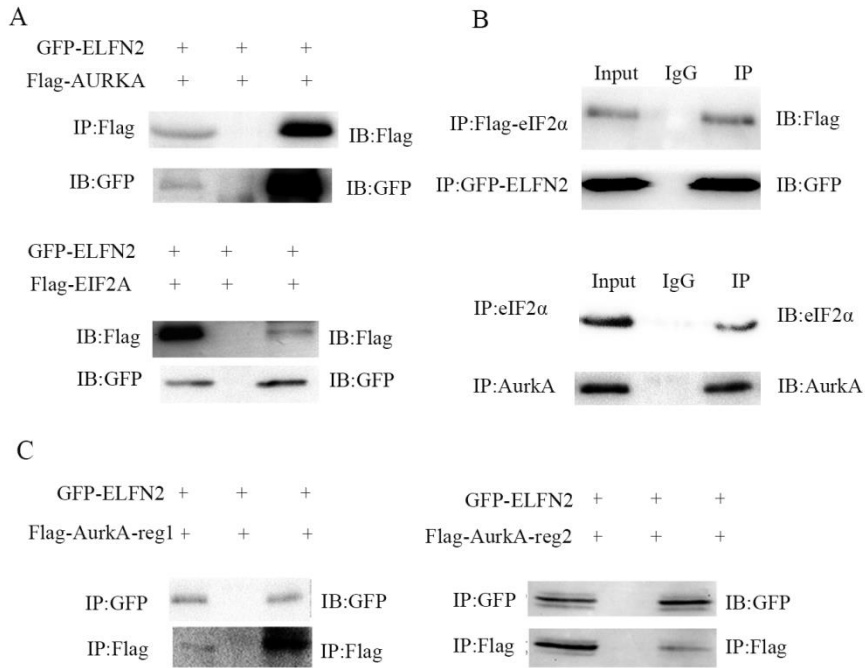

Western blotting was performed to analysis IP efficiency in HEK293 cells.

**FigureS8 Interaction between ELFN2 and reg2 domain**

**of AurkA in U251 cells**

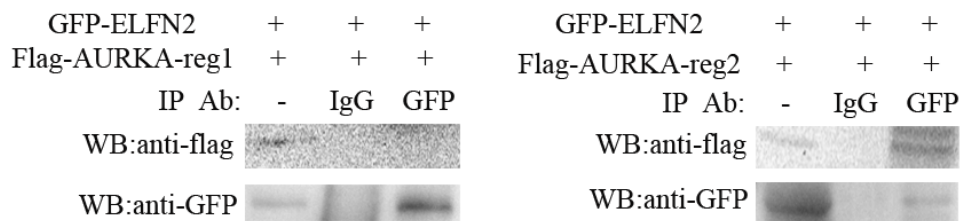

Co-IP analysis was used to detecte the interaction between ELFN2 and reg2 domain

of AurkA in U251 cells.

**FigureS9 The interaction between ELFN2 and eIF2 $\alpha$  after knockdown of AurkA in**

**U251 cells**

| U251                |                                                                                   |   |
|---------------------|-----------------------------------------------------------------------------------|---|
| ELFN2-GFP           | +                                                                                 | + |
| eIF2 $\alpha$ -flag | +                                                                                 | + |
| NC                  | +                                                                                 | - |
| si-AURKA            | -                                                                                 | + |
| IP:flag             | +                                                                                 | + |
| IB:GFP              |  |   |

Co-IP analysis was used to detect the interaction between ELFN2 and eIF2 $\alpha$  after knockdown of AurkA in U251 cells.
